# Supplementary material for: Effects of Puerarin on the Ovariectomy-Induced Depressive-Like Behavior in ICR Mice and Its Possible Mechanism of Action
Source: PubMed Central journal article supplement (PMC6943479; doi:10.3390/molecules24244569), 2019-12-13

## Supplementary Materials

### Effects of Puerarin on the Ovariectomy-Induced Depressive-Like Behavior in ICR Mice and Its Possible Mechanism of Action

Ariyawan Tantipongpiradet<sup>1</sup>, Orawan Monthakantirat<sup>1</sup>, Onchuma Vipatpakpaiboon<sup>1</sup>, Charinya Khampukdee<sup>2</sup>, Kaoru Umehara<sup>3</sup>, Hiroshi Noguchi<sup>3</sup>, Hironori Fujiwara<sup>4</sup>, Kinzo Matsumoto<sup>4</sup>, Nazim Sekeroglu<sup>5</sup>, Anake Kijjoa<sup>6\*</sup>, Yaowared Chulikhit<sup>1\*</sup>

<sup>1</sup> Division of Pharmaceutical Chemistry, Faculty of Pharmaceutical Sciences, Khon Kaen University, Khon Kaen 40002, Thailand; [ariyawanps@gmail.com](mailto:ariyawanps@gmail.com) (A.T.); [oramon@kku.ac.th](mailto:oramon@kku.ac.th) (O.M.); [onchuma.aim@gmail.com](mailto:onchuma.aim@gmail.com) (O.V.); [yaosum@kku.ac.th](mailto:yaosum@kku.ac.th) (Y.Ch.).

<sup>2</sup> Division of Research and Development, Faculty of Pharmaceutical Sciences, Khon Kaen University, Khon Kaen 40002, Thailand; [charkh@kku.ac.th](mailto:charkh@kku.ac.th) (C.K.)

<sup>3</sup> Department of Pharmacognosy, School of Pharmaceutical Sciences, University of Shizuoka, Yada 52-1, Shizuoka-shi, Shizuoka 422-8526, Japan; [umehara@u-shizuoka-ken.ac.jp](mailto:umehara@u-shizuoka-ken.ac.jp) (K.U.); [noguchi@u-shizuoka-ken.ac.jp](mailto:noguchi@u-shizuoka-ken.ac.jp) (H.N.).

<sup>4</sup> Division of Medicinal Pharmacology, Institute of Natural Medicine, University of Toyama, 2630 Sugitani, Toyama 930-0194, Japan; [arawijuf@inm.u-toyama.ac.jp](mailto:arawijuf@inm.u-toyama.ac.jp) (H.F.); [mkinzo@inm.u-toyama.ac.jp](mailto:mkinzo@inm.u-toyama.ac.jp) (K.M.)

<sup>5</sup> Department of Horticulture, Faculty of Agriculture, Killis 7 Aralik University, Killis 79000, Turkey; [nsekeroglu@gmail.com](mailto:nsekeroglu@gmail.com) (N.S.)

<sup>6</sup> ICBAS-Instituto de Ciências Biomédicas Abel Salazar and CIIMAR, Rua de Jorge Viterbo Ferreira, 228, 4050-313 Porto, Portugal; [ankijjoa@icbas.up.pt](mailto:ankijjoa@icbas.up.pt) (A.K.)

\*Correspondence: [yaosum@kku.ac.th](mailto:yaosum@kku.ac.th) (Y.Ch.) and [ankijjoa@icbas.up.pt](mailto:ankijjoa@icbas.up.pt) (A.K.), Tel.:

+351-220428331 (A.K.)

**Table S1.** One-way analysis of variance (ANOVA) test of TST.

| Group comparison      | One-way analysis of variance |                                                                  |
|-----------------------|------------------------------|------------------------------------------------------------------|
|                       | <i>P</i>                     | <i>F</i> (DF <sub>between group</sub> , DF <sub>residual</sub> ) |
| Sham <i>vs.</i> OVX   | <0.001                       | <i>F</i> (4,36)=13.095                                           |
| OVX <i>vs.</i> 2      | <0.001                       |                                                                  |
| OVX <i>vs.</i> 1(10)  | <0.001                       |                                                                  |
| OVX <i>vs.</i> 1(100) | <0.001                       |                                                                  |

**Table S2.** One-way analysis of variance (ANOVA) test of FST.

| Group comparison                    | One-way analysis of variance |                                                                  |
|-------------------------------------|------------------------------|------------------------------------------------------------------|
|                                     | <i>P</i>                     | <i>F</i> (DF <sub>between group</sub> , DF <sub>residual</sub> ) |
| Sham <i>vs.</i> OVX                 | 0.002                        | <i>F</i> (4,36)=14.729                                           |
| OVX <i>vs.</i> 2                    | <0.001                       |                                                                  |
| OVX <i>vs.</i> 1(100)               | <0.001                       |                                                                  |
| OVX + 1(10) <i>vs.</i> OVX + 1(100) | 0.008                        |                                                                  |

**Table S3.** Statistical analysis of the effect of puerarin (1) and 17 $\beta$ -estradiol (2) on uterine weight.

| Group comparison                    | One-way analysis of variance |                                                                  |
|-------------------------------------|------------------------------|------------------------------------------------------------------|
|                                     | <i>P</i>                     | <i>F</i> (DF <sub>between group</sub> , DF <sub>residual</sub> ) |
| Sham <i>vs.</i> OVX                 | <0.001                       | <i>F</i> (4,36)=60.016                                           |
| OVX <i>vs.</i> 2                    | <0.001                       |                                                                  |
| OVX <i>vs.</i> 1(100)               | 0.025                        |                                                                  |
| OVX + 1(10) <i>vs.</i> OVX + 1(100) | 0.020                        |                                                                  |

**Table S4.** Statistical analysis of the effect of puerarin (1) and 17 $\beta$ -estradiol (2) on uterine volume.

| Group comparison      | One-way analysis of variance |                                                                  |
|-----------------------|------------------------------|------------------------------------------------------------------|
|                       | <i>P</i>                     | <i>F</i> (DF <sub>between group</sub> , DF <sub>residual</sub> ) |
| Sham <i>vs.</i> OVX   | <0.001                       | <i>F</i> (4,22)=19.134                                           |
| OVX <i>vs.</i> 2      | 0.048                        |                                                                  |
| OVX <i>vs.</i> 1(100) | 0.047                        |                                                                  |

**Table S5.** Statistical analysis of the effect of administration of puerarin (1) on serum corticosterone levels.

| Group comparison      | One-way analysis of variance |                                                                  |
|-----------------------|------------------------------|------------------------------------------------------------------|
|                       | <i>P</i>                     | <i>F</i> (DF <sub>between group</sub> , DF <sub>residual</sub> ) |
| Sham <i>vs.</i> OVX   | <0.001                       | <i>F</i> (4,13)=27.707                                           |
| OVX <i>vs.</i> 2      | 0.047                        |                                                                  |
| OVX <i>vs.</i> 1(100) | 0.021                        |                                                                  |

**Table S6.** Statistical analysis of the effects of puerarin (1) and 17 $\beta$ -estradiol (2) on the hippocampal BDNF mRNA expression.

| Group comparison | One-way analysis of variance |                                                           |
|------------------|------------------------------|-----------------------------------------------------------|
|                  | P                            | F (DF <sub>between group</sub> , DF <sub>residual</sub> ) |
| Sham +OVX        | <0.001                       | -                                                         |
| OVX + 2          | 0.006                        | F(4,15)=5.795                                             |
| OVX + 1 (100)    | 0.012                        |                                                           |

**Table S7.** Statistical analysis of the effects of puerarin (1) and 17 $\beta$ -estradiol (2) on the hippocampal ER $\alpha$  mRNA expression.

| Group comparison | One-way analysis of variance |                                                           |
|------------------|------------------------------|-----------------------------------------------------------|
|                  | P                            | F (DF <sub>between group</sub> , DF <sub>residual</sub> ) |
| Sham + OVX       | <0.001                       | F(4,14)=24.135                                            |
| OVX + 2          | 0.002                        |                                                           |
| OVX + 1 (100)    | 0.008                        |                                                           |

**Table S8.** Statistical analysis of the effects of puerarin (1) and 17 $\beta$ -estradiol (2) on the hippocampal ER $\beta$  mRNA expression.

| Group comparison | One-way analysis of variance |                                                           |
|------------------|------------------------------|-----------------------------------------------------------|
|                  | P                            | F (DF <sub>between group</sub> , DF <sub>residual</sub> ) |
| Sham +OVX        | <0.001                       | -                                                         |
| OVX + 2          | <0.001                       | F(4,14)=24.135                                            |
| OVX + 1 ( 100)   | 0.003                        |                                                           |

**Table S9.** Statistical analysis of the effects of puerarin (1) on the neurogenesis in the dentate gyrus area in the hippocampus.

| Group comparison         | One-way analysis of variance |                                                           |
|--------------------------|------------------------------|-----------------------------------------------------------|
|                          | P                            | F (DF <sub>between group</sub> , DF <sub>residual</sub> ) |
| Sham vs. OVX             | <0.001                       | F(3,11)=46.83                                             |
| OVX vs. 2                | <0.001                       |                                                           |
| OVX vs. 1 (100)          | <0.001                       |                                                           |
| OVX+1(10) vs. OVX+1(100) | <0.001                       |                                                           |

**Figure S1.** HPLC chromatogram of puerarin (1) from root bark of *Pueraria candollei* var. *mirifica*.

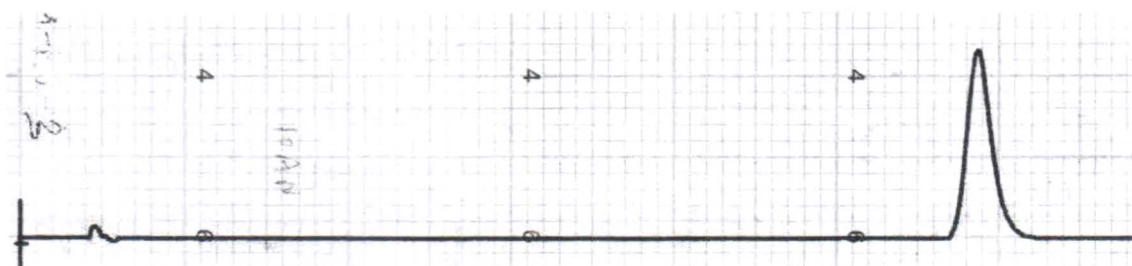



**Figure S4.**  $^{13}\text{C}$  NMR spectrum of puerarin (**1**) (100 MHz,  $\text{DMSO-}d_6$ )

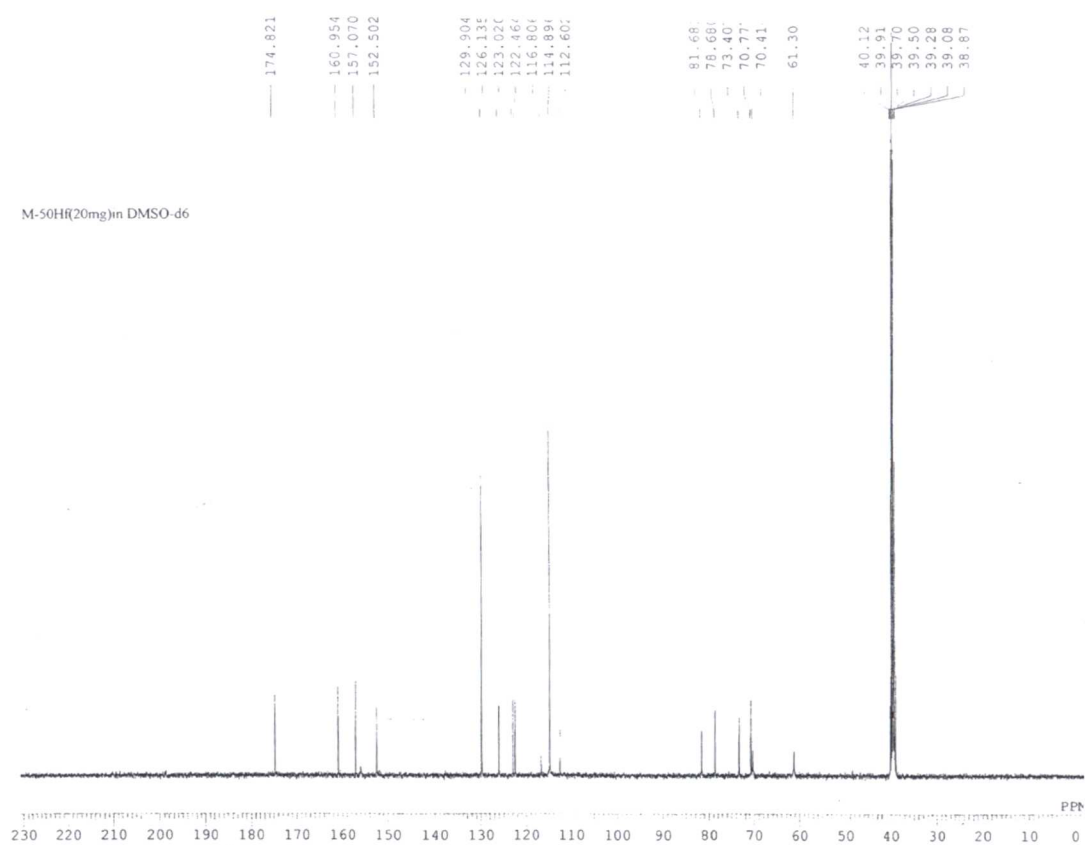

Supplement: molecules-24-04569-s001.pdf [file molecules-24-04569-s001.pdf]
